# Supplementary material
Source: publisher site journal article supplement (https://www.dovepress.com/article/304320)
Supplement: Supplementary file 1 [file get_supplementary_file.php]

**Online Supplementary Materials:**

**Figure S1. Changes of mRNA expression of IL-25, IL-17RB, and antiviral host factors after RSV infection at different time-points, as indicated by a heatmap using RT-qPCR.** Redcolor indicates up-regulation, while blue color indicates down-regulation. p < 0.05 is considered statistically significant.

**Figure S2. Inhibition of viral replication titers by different concentrations of IFN-α.** Titration of IFN-α concentrations to determine working drug dose to be used in the main experiments. The y-axis depicts the fold changes in viral titers. p < 0.05 is considered statistically significant.

**Figure S3. Cell viability assay of hNECs with IFN-α treatment.** Viability of IFN-α treated hNECs decreased, but showed no significant differences compared with infected hNECs, which indicated no additional toxicity than that caused by influenza infection.

**Figure S4. Co-localization of IL-25 and viral-nucleoprotein in nasal epithelial cells.** Representative IF images of influenza-infected hNECs are shown at 1000× magnification. Green – influenza virus nucleoprotein (NP); red – IL-25; blue – DAPI.

**Figure S5. Proposed model of IL-25 induction during active respiratory virus infection in airway epithelial cells and its amelioration by IFN-α treatment.** Left: Upon viral infection, epithelial cells express IL-25 which may lead to type 2 inflammation via downstream immune cells. Right: Pretreatment using antivirals such as IFN-α results in efficient inhibition of active influenza virus replication. The reduction in virus replication in turn reduces virus-mediated production of IL-25, which can potentially reduce type 2 inflammation.

**Table S1. Sequences of primers used for RT-qPCR analysis**

**Table S2. Demographics of subjects**

**Table S3. Information on donors of human nasal epithelial cells used in this study**

Figure S1


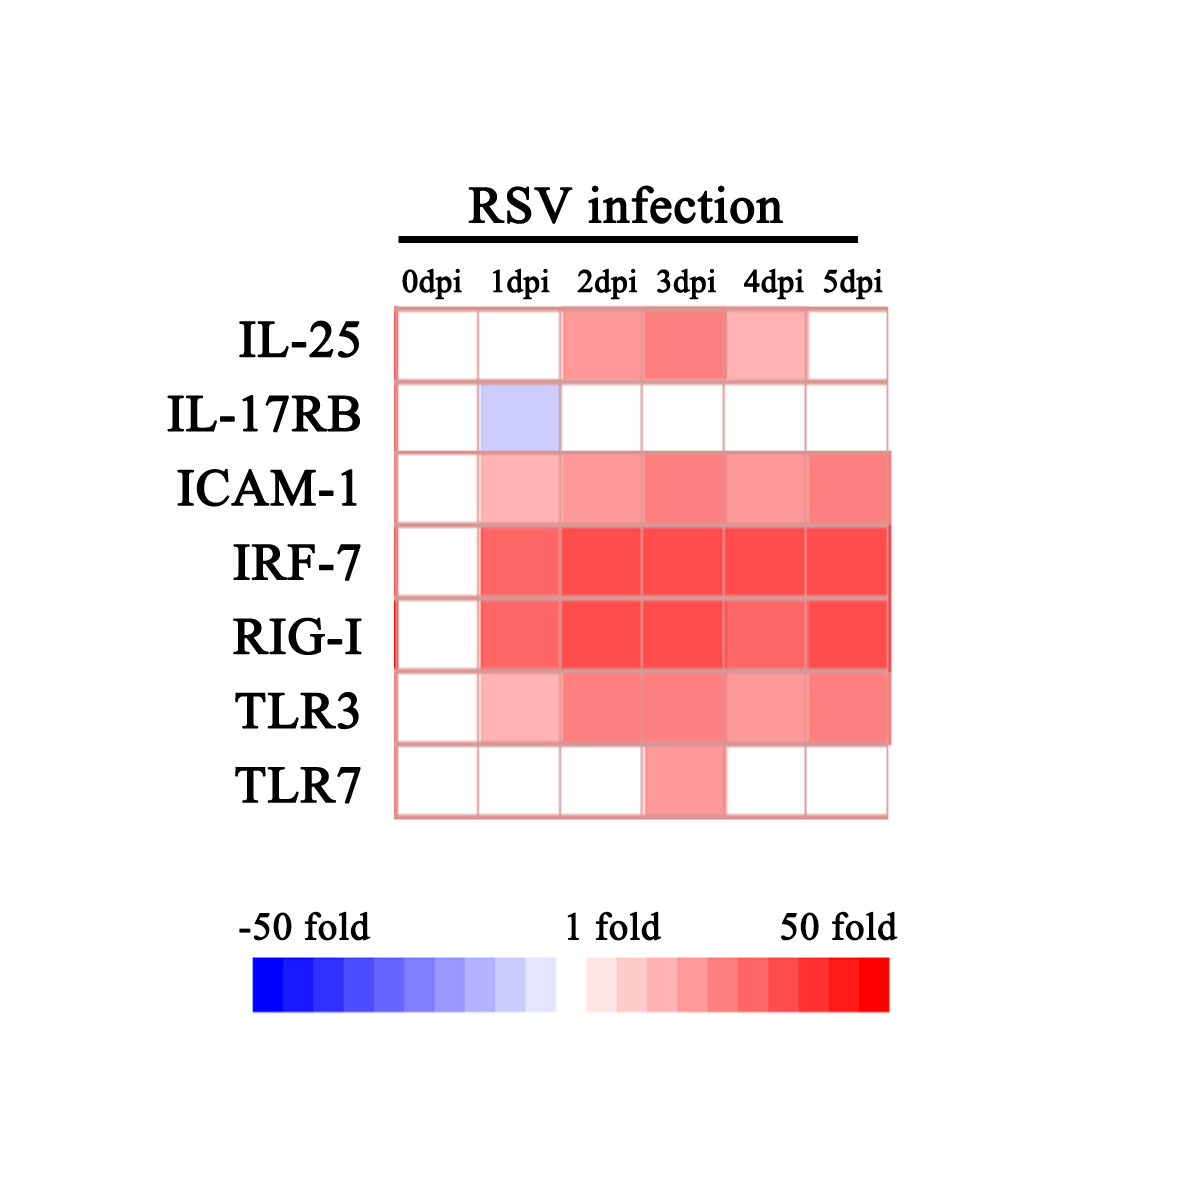


Figure S2


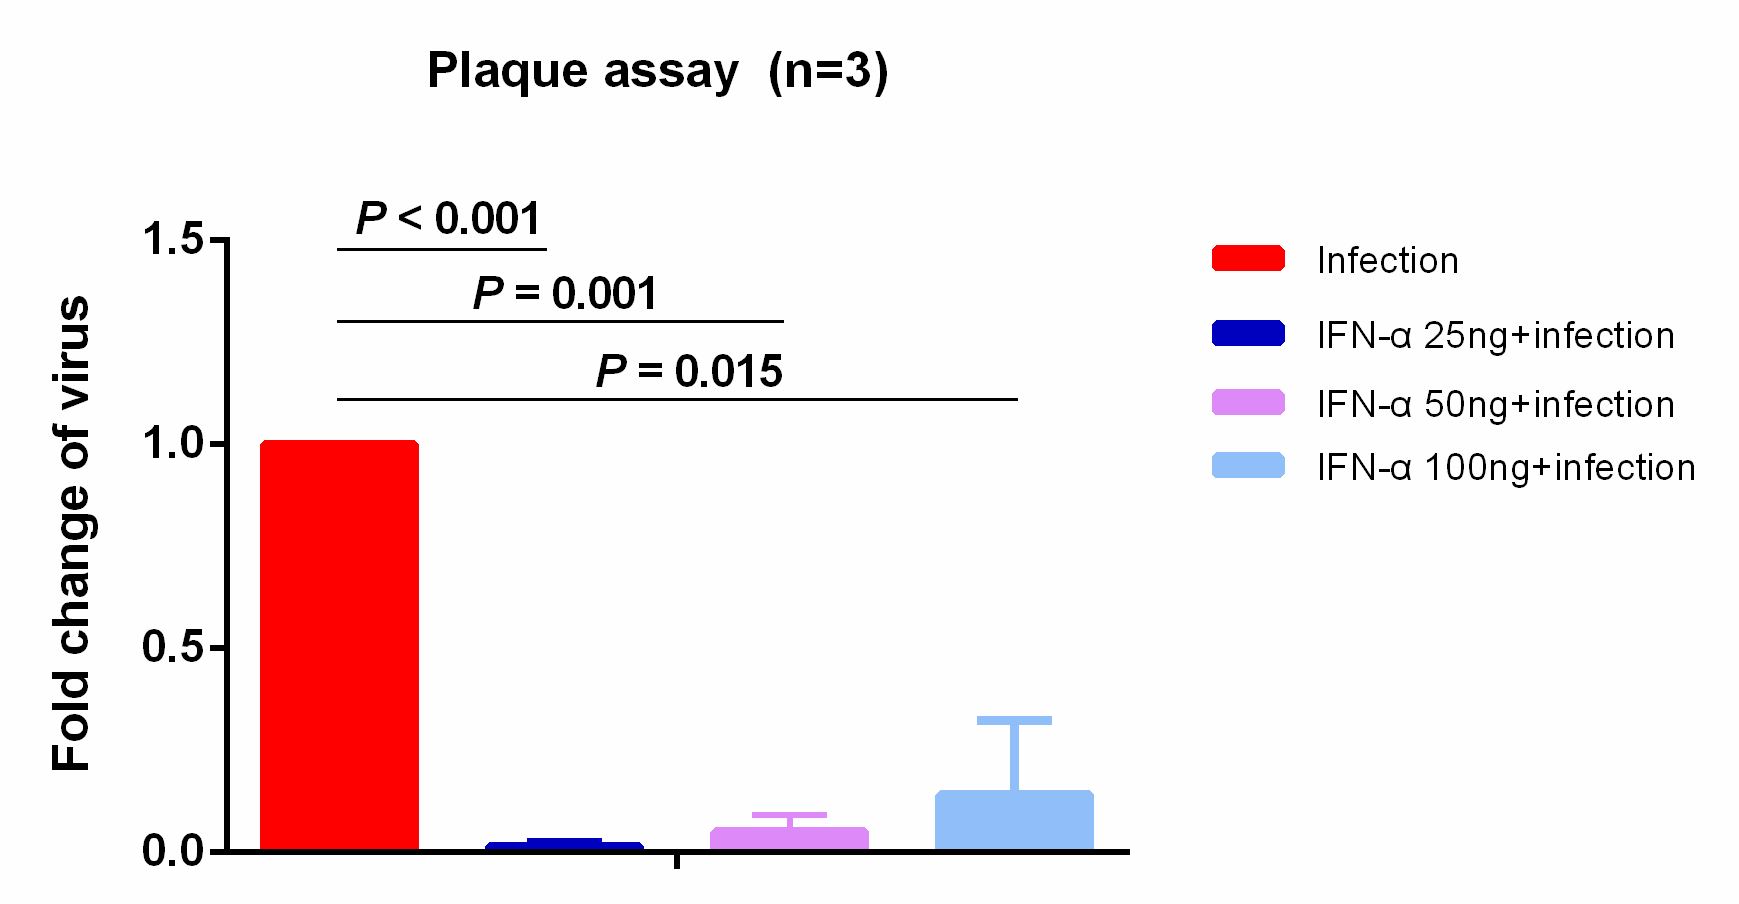


Figure S3


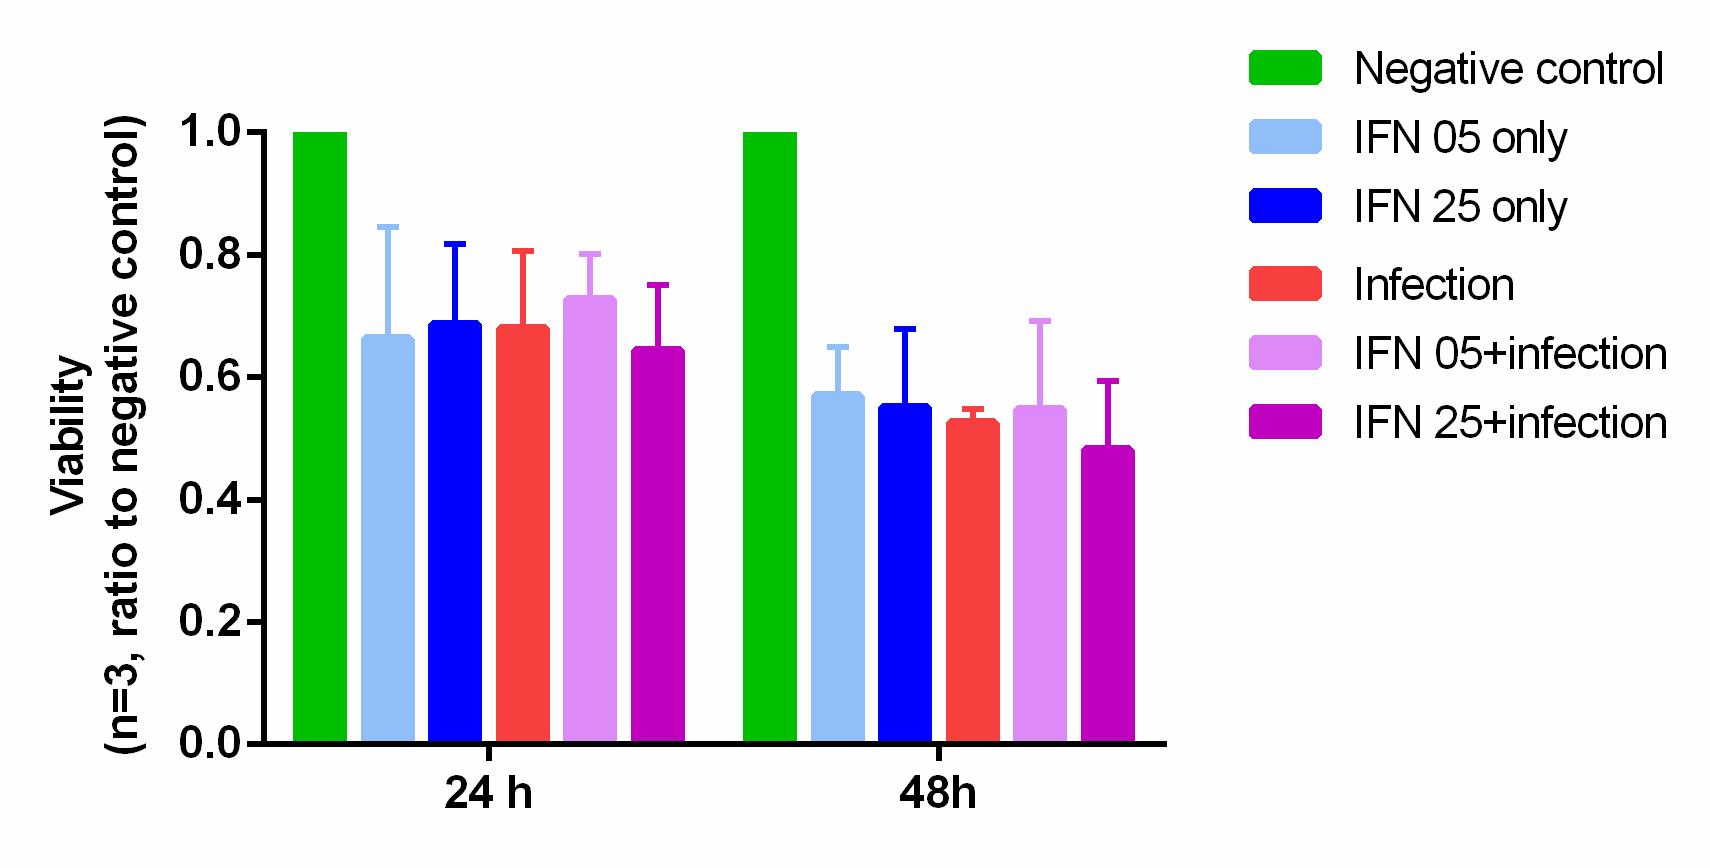


Figure S4


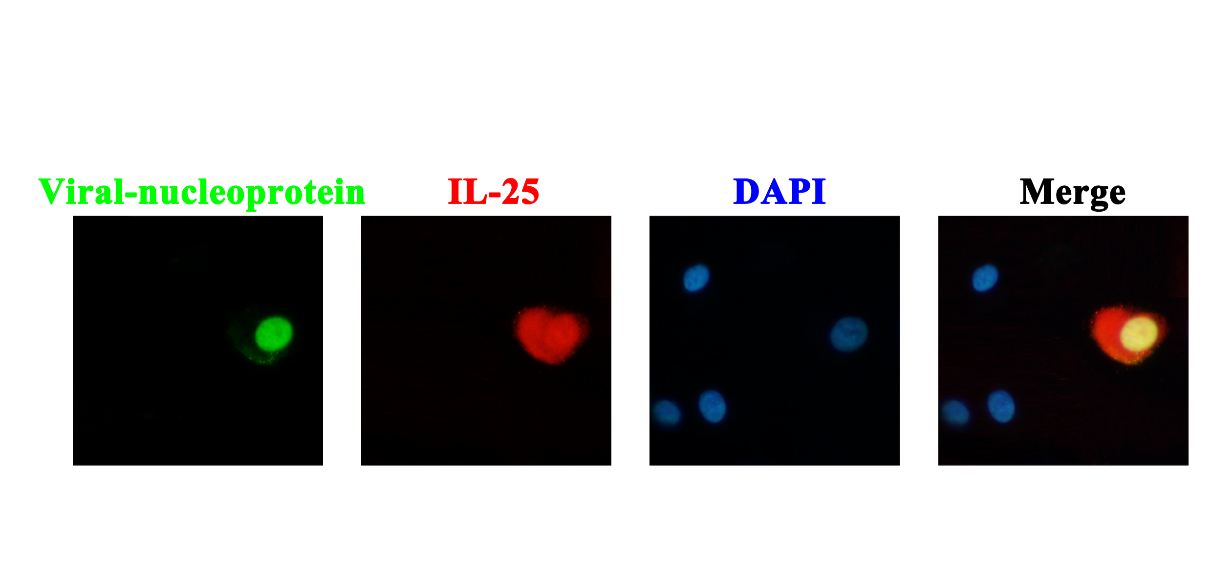


Figure S5


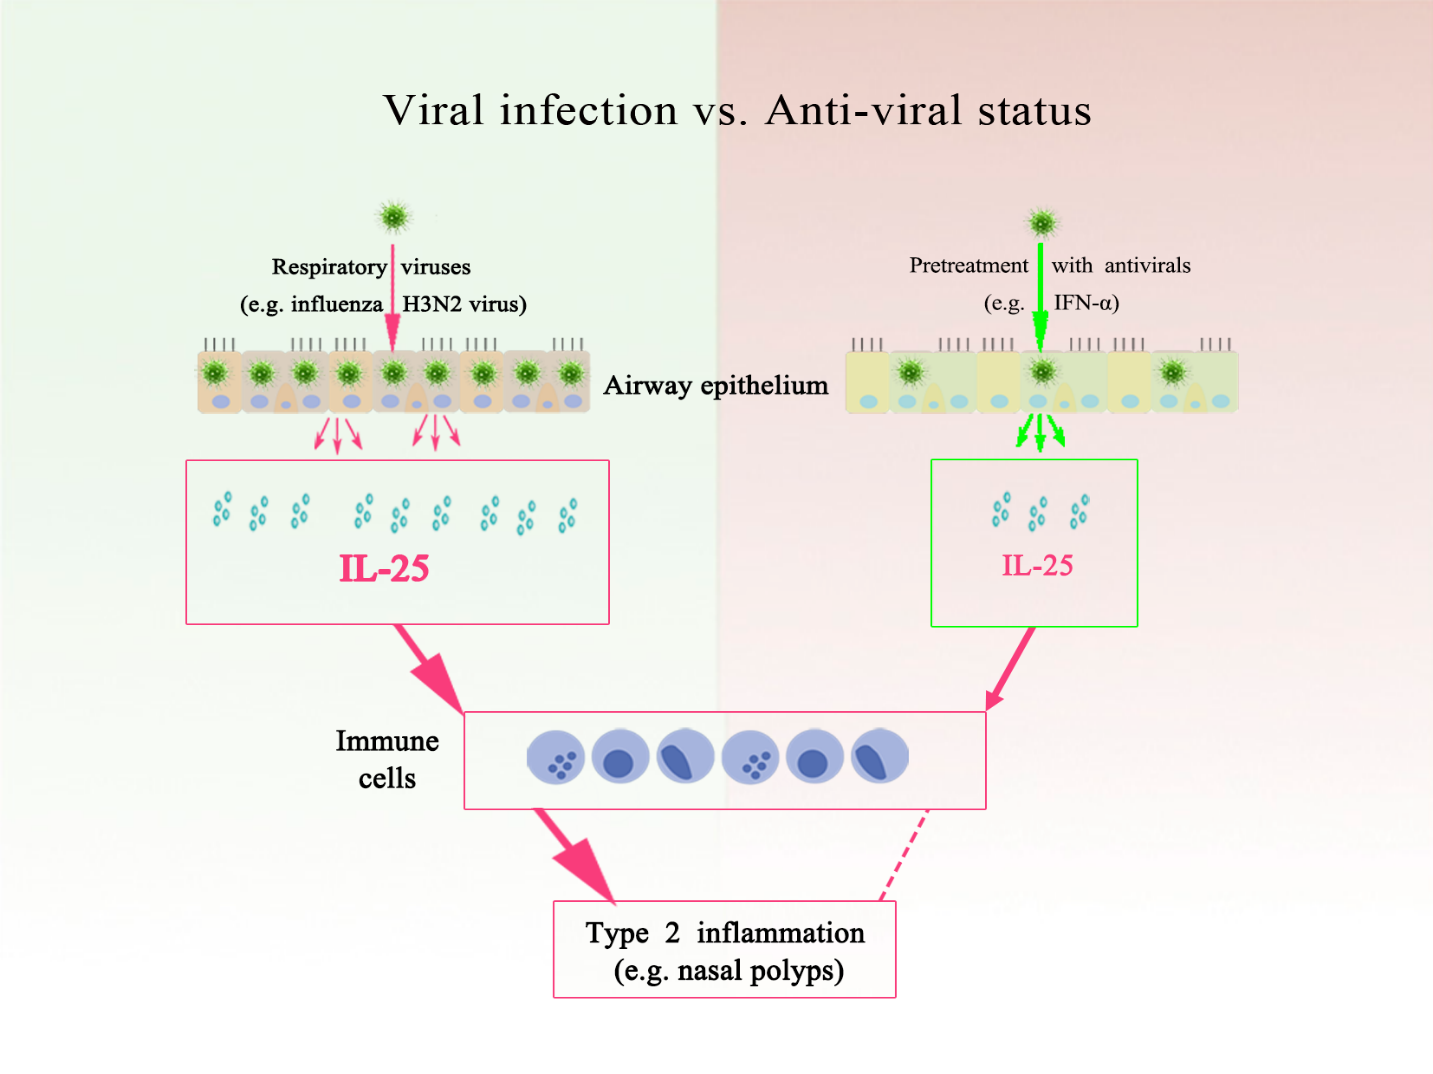


| **Table S1. Sequences of primers used for RT-qPCR analysis** | | | | |
| --- | --- | --- | --- | --- |
| **Target gene** | | **Forward** |  | **Reverse** |
|  | **IL-25** | **CCAGGTGGTTGCATTCTTGG** |  | **TGGCTGTAGGTGTGGGTTCC** |
|  | **IL-17RB** | **GGCTTCCTATCCCACCAATT** |  | **AGGCTGTTTGTAGGCTGCA** |
|  | **IL-4** | **GCAGTT CTACAGCCACCATG** |  | **ATGATCGTCTTTAGCCTTTCC** |
|  | **IL-5** | **ATCTTTCAGGGAATAGGCACAC** |  | **CCGTCTTTCTTCTCCACACTTT** |
|  | **IL-13** | **AGCATGGTATGGAGCATCAA** |  | **CAGCATCCTCTGGGTCTTCT** |
|  | **IFN-γ** | **TTTTGAAGAATTGGAAAGAGGA** |  | **CACTTGGATGAGTTCATGTATTG** |
|  | **IL-17A** | **TCAACGCTGATGGGAACG** |  | **TCTTGCTGGATGGGGACA** |
|  | **ICAM1** | **ACCATCTACAGCTTTCCG** |  | **TCACACTTCACTGTCACC** |
|  | **IRF7** | **TCTTCTTCCAAGAGCTGG** |  | **CTATCCAGGGAAGACACAC** |
|  | **RIG-I** | **GGTATAGAGTTACAGGCATTTC** |  | **TTGTTTACTAGTGTTGTGGC** |
|  | **TLR3** | **AGATTCAAGGTACATCATGC** |  | **CAATTTATGACGAAAGGCAC** |
|  | **TLR7** | **AGATATAGGATCACTCCATGC** |  | **CTTCCAAAATGGAATGTAGAGG** |
|  | **β-actin** | **GTCACCAACTGGGACGACA** |  | **CACAGCCTGGATAGCAACG** |
|  | **PGK1** | **CTCAACAACATGGAGATTGG** |  | **CTTTGGACATTAGGTCTTTGAC** |
| ICAM1, intercellular adhesion molecule 1; IFN-γ, interferon-gamma; IL, interleukin; IRF7, interferon regulatory factor 7; PGK1, phosphoglycerate kinase 1; RIG-I, retinoic acid-inducible gene I; TLR, toll-like receptor | | | | |

| **Table S2. Demographics of subjects** | | | |  |
| --- | --- | --- | --- | --- |
|  | **Control Subjects** | **Patients with CRSsNP** | **Patients with CRSwNP** |  |
| **No.** | 15 | 25 | 60 |  |
| **Tissue sampled** | UP | UP | NP |  |
| **Age (years), mean (SD)** | 34·1 (11·20) | 35·2 (9·51) | 36·4 (9·44) |  |
| **Atopy, no. (%)** | 3 (20·0) | 4 (16·0) | 13 (21·67) |  |
| **Asthma, no. (%)** | 0 | 0 | 0 |  |
| **Aspirin sensitivity, no.** | 0 | 0 | 0 |  |
| **Sex (male/female)** | 10/5 | 16/9 | 43/17 |  |
| **NP endoscopic scores,**  **mean (SD)** | N/A | N/A | 5·4 (1·42) |  |
| **CT scores, mean (SD)** | N/A | 7·28 (2·54) | 12·25 (4·98)# |  |
| **Total IgE (IU/mL), mean (SD)** | 11·9 (5·35) | 76·05 (33·64)* | 85·72 (47·86)* |  |
| **Methodologies used** |  |  |  |  |
| **Tissue IHC** | 15 | 25 | 60 |  |
| **Tissue mRNA** | 15 | 25 | 60 |  |
| **Flow cytometry** | 0 | 0 | 6 |  |
| **Luminex** | 0 | 10 | 20 |  |

Definition of abbreviations: CRSsNP, chronic rhinosinusitis without nasal polyps; CRSwNP, chronic rhinosinusitis with nasal polyps; NP, nasal polyps; UP, uncinate process; N/A, not applicable. *p<0·05, compared with control subjects. #p<0·05, compared with subjects with CRSsNP.

| **Table S3. Information on donors of human nasal epithelial cells used in this study** | | | | | | | |
| --- | --- | --- | --- | --- | --- | --- | --- |
| **Code** | **Age ( Y )** | **Sex** | **Diagnosis** | **Sample** | **Smoking history** | **Drug treatment*** | **Interventions** |
| H 01 | 22 | M | SD+AR | IT | Non-smoker | Yes | Infection with  influenza H3N2 virus (Aichi 2 strain), rhinovirus (RV16 strain), and respiratory syncytial virus (A2 strain),  and screening the concentrations and toxicity of IFN-α protein |
| H 02 | 39 | M | SD+AR | IT | Non-smoker | Yes |
| H 03 | 22 | M | SD | IT | Non-smoker | Yes |
| H 04 | 22 | M | SD+AR | IT | Non-smoker | Yes |
| H 05 | 42 | M | SD | IT | Non-smoker | No |
| H 06 | 61 | M | CRSwNP | NP | Non-smoker | No |
| H 07 | 67 | F | CRSwNP | NP | Non-smoker | Yes |
| H 08 | 26 | M | CRSwNP | NP | Non-smoker | Yes |
| H 09 | 63 | M | CRSwNP | NP | Non-smoker | Yes |
| H 10 | 41 | M | CRSwNP | NP | Non-smoker | Yes |
| H 11 | 59 | M | CRSwNP | NP | Non-smoker | No |
| H 12 | 29 | M | SD | IT | Non-smoker | No |
| H 13 | 33 | M | SD+AR | IT | Non-smoker | Yes |
| H 14 | 58 | M | CRSwNP | NP | Non-smoker | Yes | Pretreatment with IFN-α and infection with influenza H3N2 virus (Aichi 2 strain) |
| H 15 | 47 | M | CRSwNP | NP | Non-smoker | Yes |
| H 16 | 65 | M | CRSwNP | NP | Non-smoker | Yes |
| H 17 | 46 | M | CRSwNP | NP | Non-smoker | Yes |

Y, years; F, female; M, male; AR, allergic rhinitis; IT, inferior turbinate; SD, septal deviation; NP, nasal polyp; CRSwNP, Chronic rhinosinusitis with nasal polyps. *Corticosteroids and/or antibiotics within 3 months before surgery.
